# Supplementary material
Source: PubMed Central journal article supplement (PMC4289428)
Supplement: NIHMS617909-supplement-01.pdf [file NIHMS617909-supplement-01.pdf]

## Supplementary data

**Supplementary Table 1.** Types of mutations in the *gpt* transgene induced by AFB<sub>1</sub> in liver of offspring following treatment *in utero* by *i.p.* injection. Mutations were measured three and ten weeks after birth.

| Mutation Types                 | 3 Weeks  |                  | 10 Weeks |                  |
|--------------------------------|----------|------------------|----------|------------------|
|                                | DMSO     | AFB <sub>1</sub> | DMSO     | AFB <sub>1</sub> |
| <b>Transition:</b>             |          |                  |          |                  |
| G:C to A:T                     | 5 (23)   | 25 (27)          | 20 (44)  | 40 (26)          |
| A:T to G:C                     | 1 (5)    | 1 (1)            | 2 (4)    | 5 (3)            |
| <b>Transversion:</b>           |          |                  |          |                  |
| G:C to T:A                     | 4 (18)   | 45 (49)          | 5 (11)   | 64 (42)          |
| G:C to C:G                     | 2 (9)    | 6 (7)            | 2 (4)    | 12 (8)           |
| A:T to T:A                     | 0 (0)    | 1 (1)            | 1 (2)    | 5 (3)            |
| A:T to C:G                     | 1 (5)    | 2 (2)            | 2 (4)    | 3 (2)            |
| <b>Deletion</b>                |          |                  |          |                  |
| 1 bp                           | 5 (23)   | 7 (8)            | 12 (26)  | 13 (10)          |
| >1 bp                          | 1 (5)    | 1 (1)            | 1 (2)    | 3 (2)            |
| <b>Insertion</b>               | 3 (14)   | 3 (3)            | 1 (2)    | 6 (4)            |
| <b>Total number of mutants</b> | 22 (100) | 91 (100)         | 46 (100) | 153 (100)        |

Numbers in parentheses = percent of total
